# Supplementary material
Source: PubMed Central journal article supplement (PMC5770099)
Supplement: Supp_Fig1.pdf [file Supp_Fig1.pdf]

## Supplementary Data

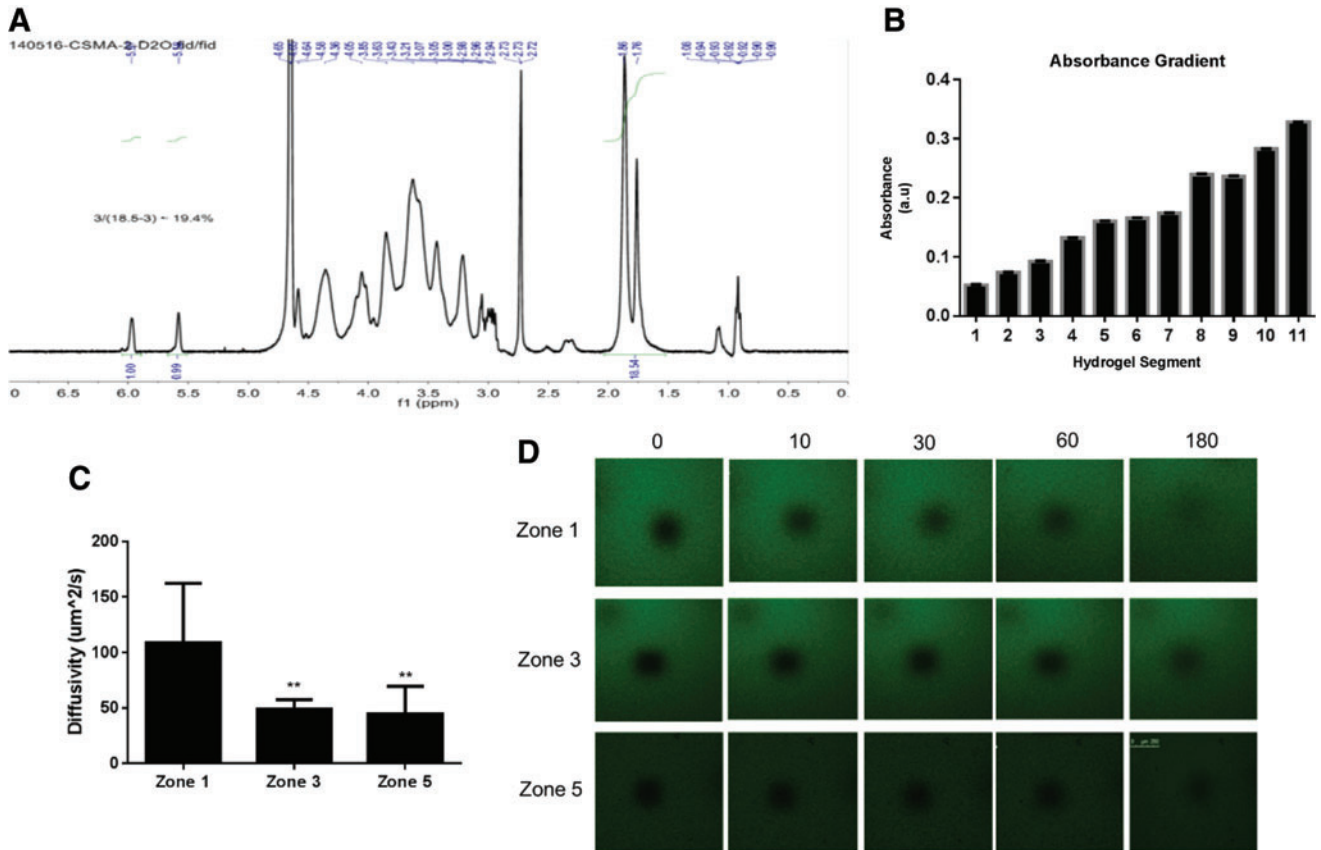

**SUPPLEMENTARY FIG. S1.** (A) Chondroitin sulfate methacrylation NMR data (~20%). (B) Absorbance gradient indicates the concentration gradient of polymer solution. (C, D) Diffusivity measured within selected zones of gradient hydrogel (zone 1, 3, and 5), with representative fluorescence recovery profile images (\*\* $p < 0.01$ ). NMR, nuclear magnetic resonance.
