# Supplementary material
Source: PubMed Central journal article supplement (PMC5770099)
Supplement: Supp_Fig2.pdf [file Supp_Fig2.pdf]

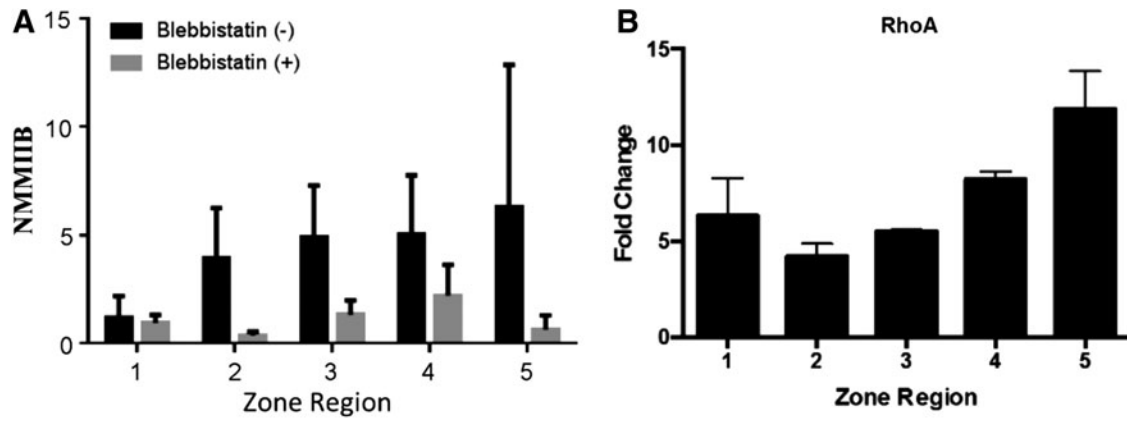

**SUPPLEMENTARY FIG. S2.** Cellular responses within 3D gradient hydrogels. (A) Nonmuscle myosin II gene expressions of chondrocytes encapsulated within five zones. (B) Normalized quantitative gene expression of RhoA by chondrocytes encapsulated in different zones across 3D gradient hydrogels on day 7. 3D, three dimensional.
