# Supplementary material
Source: PubMed Central journal article supplement (PMC5770099)
Supplement: Supp_Fig4.pdf [file Supp_Fig4.pdf]

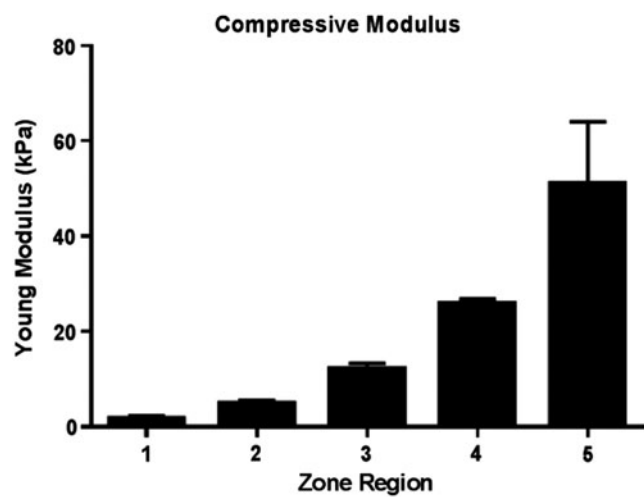

**SUPPLEMENTARY FIG. S4.** Measurement of compressive modulus from zone 1 to zone 5 in chondrocyte-laden gradient hydrogel after the 3-week culture.
